# Supplementary material for: Ionic liquids containing half-sandwich ruthenium complexes: in situ interconversions via photochemical and thermal ligand exchange
Source: Royal Society of Chemistry journal article supplement (doi:10.1039/d3nj03953f), 2023-01-01
Supplement: d3nj03953f1.pdf [file d3nj03953f1.pdf]

## Supporting Information

### Ionic liquids containing half-sandwich ruthenium complexes: in-situ interconversions via photochemical and thermal ligand exchange

Tomoyuki Mochida,<sup>\*a,b</sup> Syou Maekawa,<sup>a</sup> and Ryo Sumitani<sup>a</sup>

<sup>a</sup>*Department of Chemistry, Graduate School of Science, Kobe University, Rokkodai, Nada, Kobe, Hyogo 657-8501, Japan. E-mail: tmochida@platinum.kobe-u.ac.jp*

<sup>b</sup>*Research Center for Membrane and Film Technology, Kobe University, Rokkodai, Nada, Kobe, Hyogo 657-8501, Japan*

#### Contents

**Fig. S1.** <sup>1</sup>H NMR spectra of (a) **1-MeCN**, (b) **1-SMe<sub>2</sub>**, and (c) **1-DMSO** (CD<sub>3</sub>CN).

**Fig. S2.** <sup>1</sup>H NMR spectra of (a) **1-CO** and (b) **2-CO** (CD<sub>3</sub>CN).

**Fig. S3.** Packing diagram of **1-MeCN** viewed along the *a*-axis.

**Fig. S4.** Simulated UV-vis spectra of **1-L** based on TD-DFT calculations.

**Fig. S5.** TG-DTA curves of **1-L** and **2-CO**.

**Fig. S6.** <sup>1</sup>H NMR spectra of **1-CO** before and after photoirradiation for 30 min (CD<sub>3</sub>CN).

**Fig. S7.** Molecular orbitals of the cations in **1-L** and **2-CO** obtained by DFT calculations.

**Table S1.** Crystallographic parameters

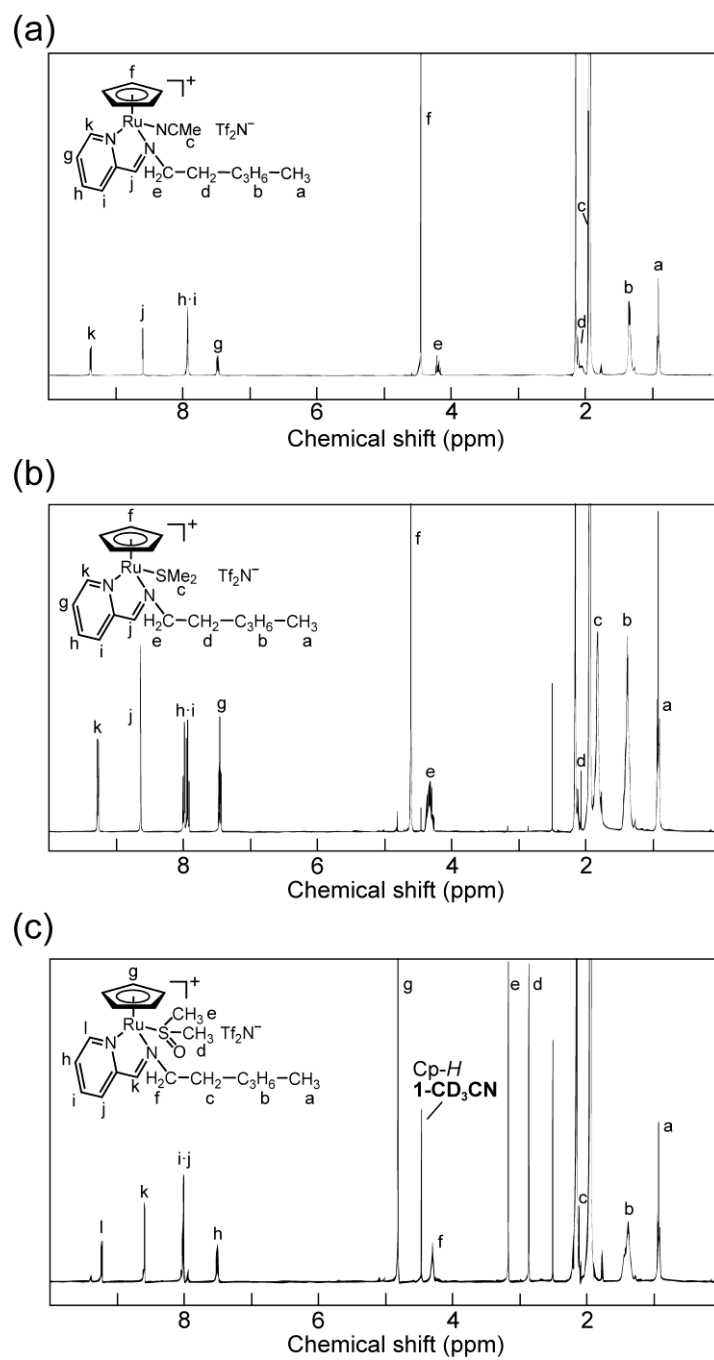

**Figure S1.**  $^1\text{H}$  NMR spectra of (a) **1-MeCN**, (b) **1-SMe<sub>2</sub>**, and (c) **1-DMSO** (in  $\text{CD}_3\text{CN}$ ).

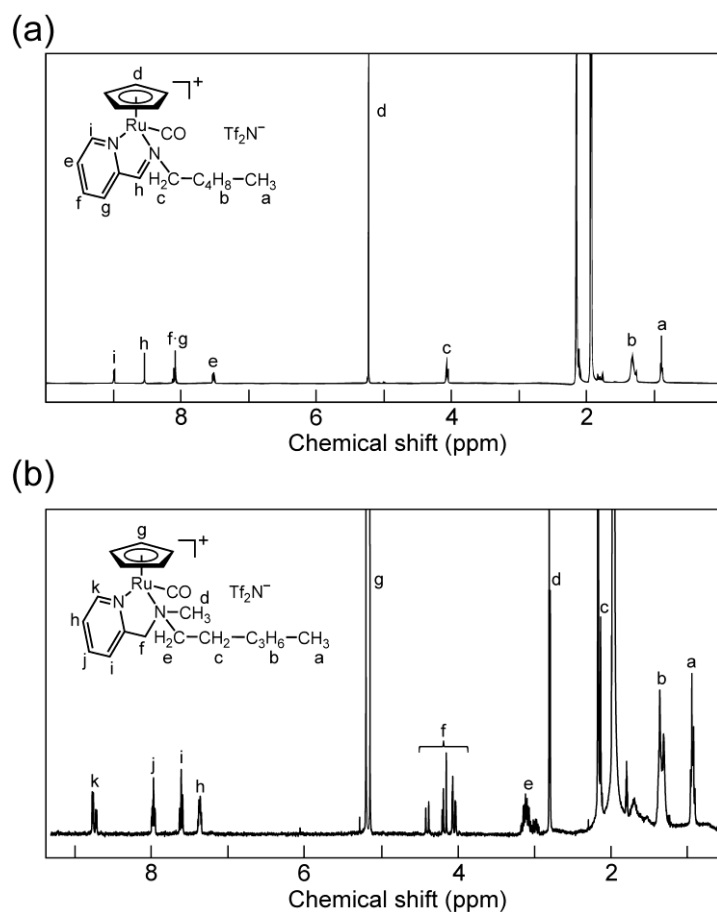

**Figure S2.**  $^1\text{H}$  NMR spectra of (a) **1-CO** and (b) **2-CO** (in  $\text{CD}_3\text{CN}$ ).

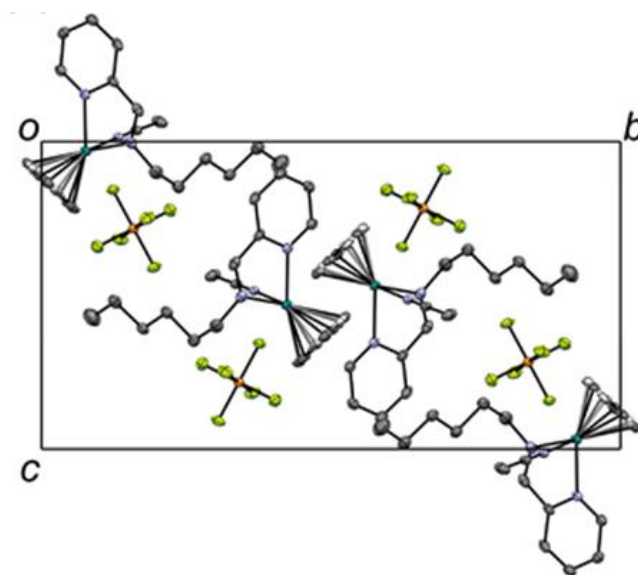

**Figure S3.** Packing diagram of **1-MeCN** viewed along the  $a$ -axis. Hydrogen atoms are omitted for clarity.

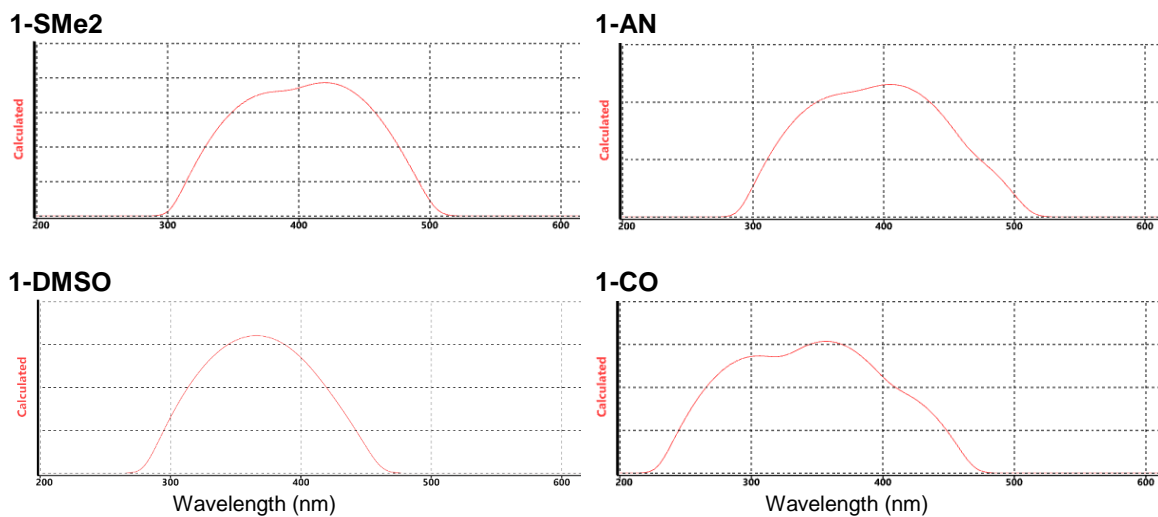

**Figure S4.** Simulated UV-vis spectra of **1-L** based on TD-DFT calculations.

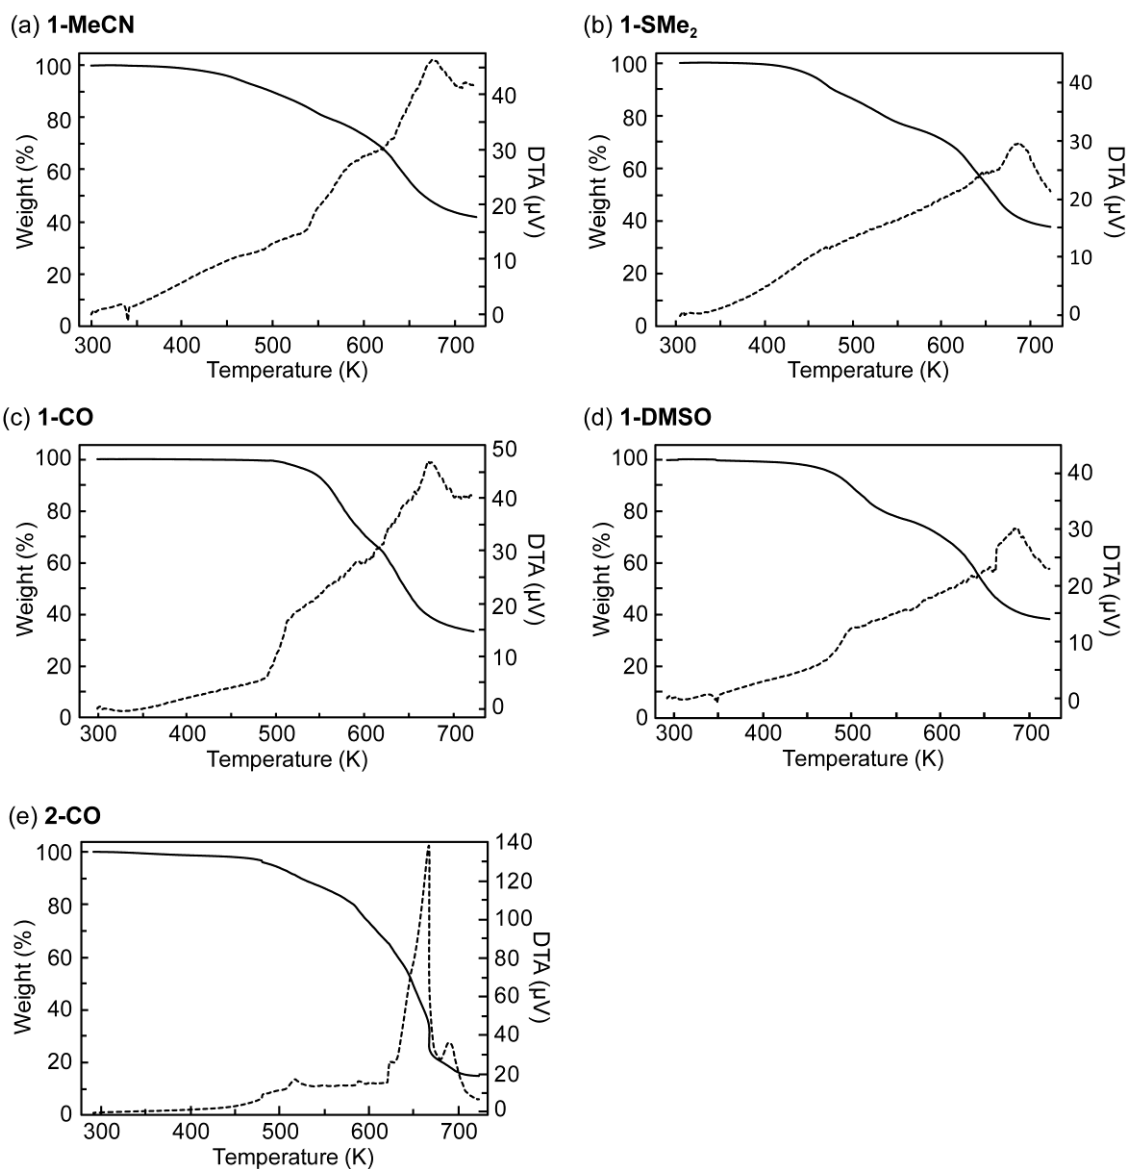

**Figure S5.** TG-DTA curves of **1-L** and **2-CO**.

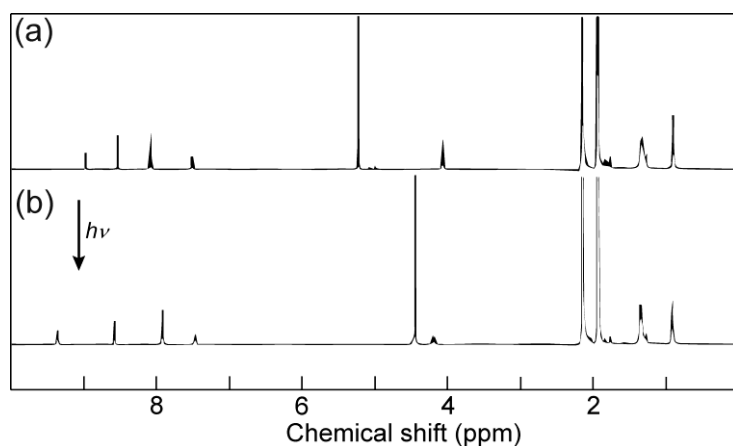

**Figure S6.**  $^1\text{H}$  NMR spectra of **1-CO** before and after photoirradiation for 30 min ( $\text{CD}_3\text{CN}$ ).

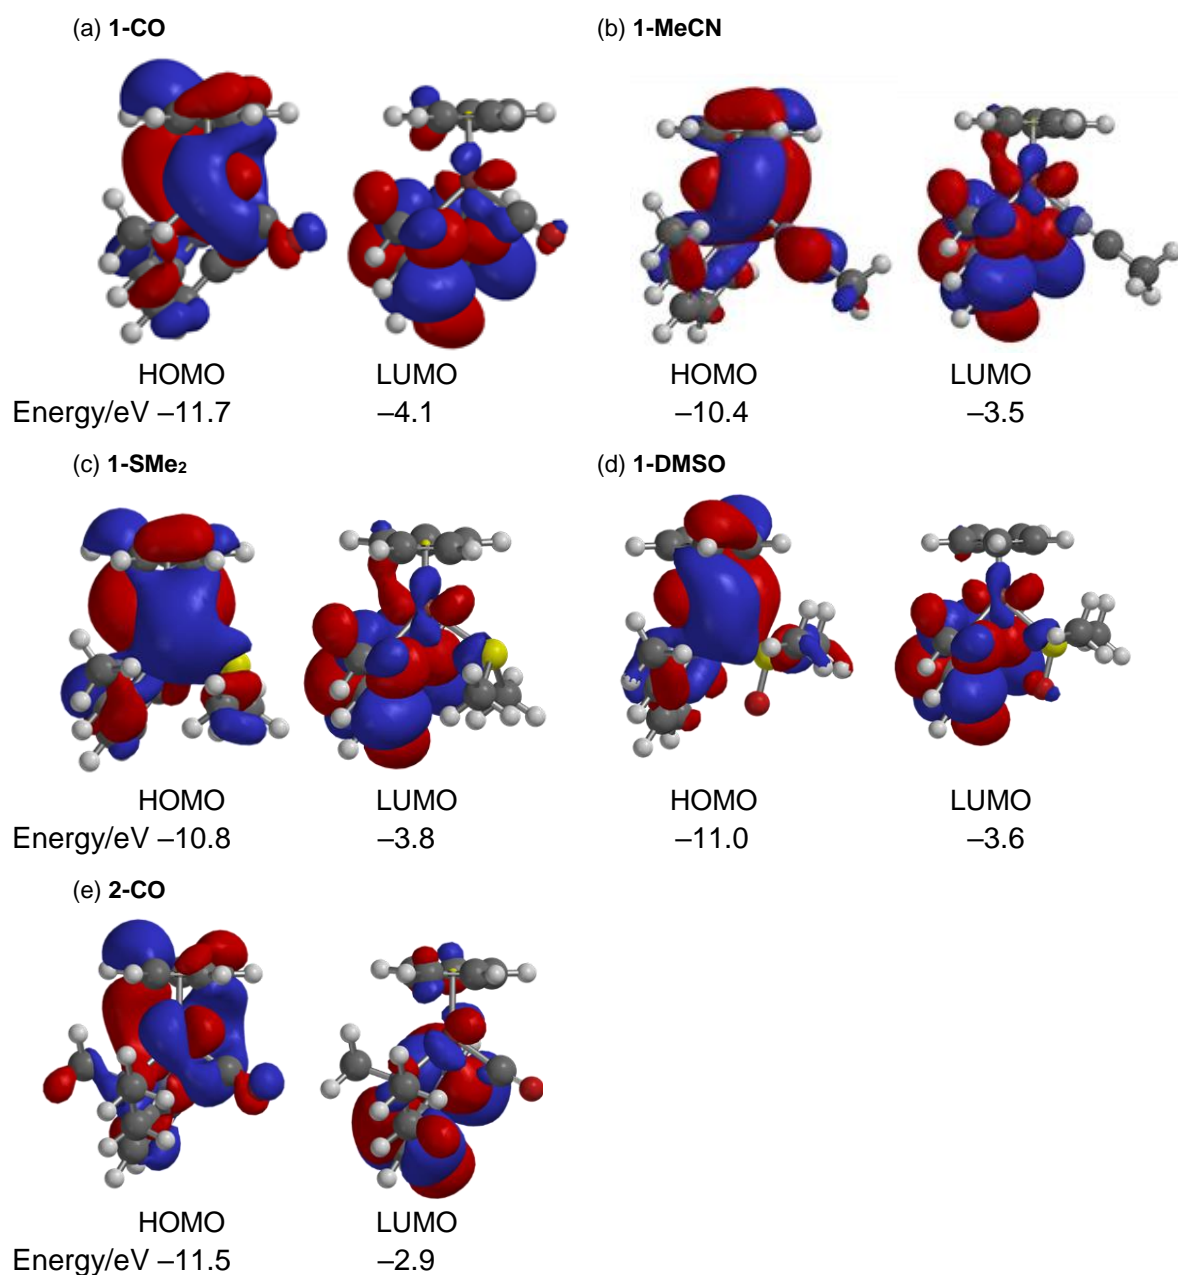

**Figure S7.** Molecular orbitals of the cations in **1-L** and **2-CO** obtained by DFT calculations.

**Table S1.** Crystallographic parameters

|                                                                                                                    | [Ru(Cp)L <sup>1</sup> (MeCN)]PF <sub>6</sub>                      |
|--------------------------------------------------------------------------------------------------------------------|-------------------------------------------------------------------|
| Empirical formula                                                                                                  | C <sub>19</sub> H <sub>26</sub> F <sub>6</sub> N <sub>3</sub> PRu |
| Formula weight                                                                                                     | 542.47                                                            |
| Crystal system                                                                                                     | monoclinic                                                        |
| Space group                                                                                                        | <i>P</i> 2 <sub>1</sub> / <i>c</i>                                |
| <i>a</i> [Å]                                                                                                       | 9.4336(12)                                                        |
| <i>b</i> [Å]                                                                                                       | 21.056(3)                                                         |
| <i>c</i> [Å]                                                                                                       | 11.5841(14)                                                       |
| $\beta$ [°]                                                                                                        | 104.669(2)                                                        |
| <i>V</i> [Å <sup>3</sup> ]                                                                                         | 2226.0(5)                                                         |
| <i>Z</i>                                                                                                           | 4                                                                 |
| $\rho_{\text{calcd}}$ [g cm <sup>-3</sup> ]                                                                        | 1.619                                                             |
| <i>F</i> (000)                                                                                                     | 1096                                                              |
| Temperature [K]                                                                                                    | 90                                                                |
| Reflns collected                                                                                                   | 12833                                                             |
| Independent reflns                                                                                                 | 5085                                                              |
| Parameters                                                                                                         | 319                                                               |
| <i>R</i> <sub>int</sub>                                                                                            | 0.0446                                                            |
| <i>R</i> <sub>1</sub> <sup><i>a</i></sup> , <i>R</i> <sub>w</sub> <sup><i>b</i></sup> ( <i>I</i> > 2σ( <i>I</i> )) | 0.0355, 0.0661                                                    |
| <i>R</i> <sub>1</sub> <sup><i>a</i></sup> , <i>R</i> <sub>w</sub> <sup><i>b</i></sup> (all data)                   | 0.0569, 0.0726                                                    |
| Goodness of fit                                                                                                    | 0.991                                                             |
| $\Delta\rho_{\text{max,min}}$ [e Å <sup>-3</sup> ]                                                                 | 0.519, -0.681                                                     |
| $\mu$ (Mo-K $\alpha$ )                                                                                             | 0.836                                                             |

$${}^a R_1 = \frac{\sum ||F_o| - |F_c||}{\sum |F_o|}, {}^b R_w = \left[ \frac{\sum w (F_o^2 - F_c^2)^2}{\sum w (F_o^2)^2} \right]^{1/2}$$
